# Supplementary material for: Enhanced energy harvester performance by a tension annealed carbon nanotube yarn at extreme temperatures
Source: Royal Society of Chemistry journal article supplement (doi:10.1039/d2nr05303a), 2022-01-01
Supplement: d2nr05303a1.pdf [file d2nr05303a1.pdf]

## Enhanced energy harvester performance by tension annealed carbon nanotube yarn at extreme temperatures

Xinghao Hu<sup>1,2</sup>, Xianfu Bao<sup>1</sup>, Jian Wang<sup>1</sup>, Xiaoshuang Zhou<sup>1</sup>, Hongwei Hu<sup>1</sup>, Luhua Wang<sup>3</sup>, Zhongqiang Zhang<sup>1</sup>, Ningyi Yuan<sup>2</sup>, Guanggui Cheng<sup>1,2†</sup>, Jianning Ding<sup>1,2†</sup>

<sup>1</sup> Institute of Intelligent Flexible Mechatronics, Jiangsu University, Zhenjiang, 212013, PR China

<sup>2</sup> Jiangsu Collaborative Innovation Center of Photovoltaic Science and Engineering, Changzhou University, Changzhou 213164, China

<sup>3</sup> Suzhou Institute of Nano-tech and Nano-bionics, Chinese Academy of Sciences, Suzhou 215123, China

† To whom correspondence should be addressed: E-mail: [ggcheng@ujs.edu.cn](mailto:ggcheng@ujs.edu.cn); [dingjn@ujs.edu.cn](mailto:dingjn@ujs.edu.cn)

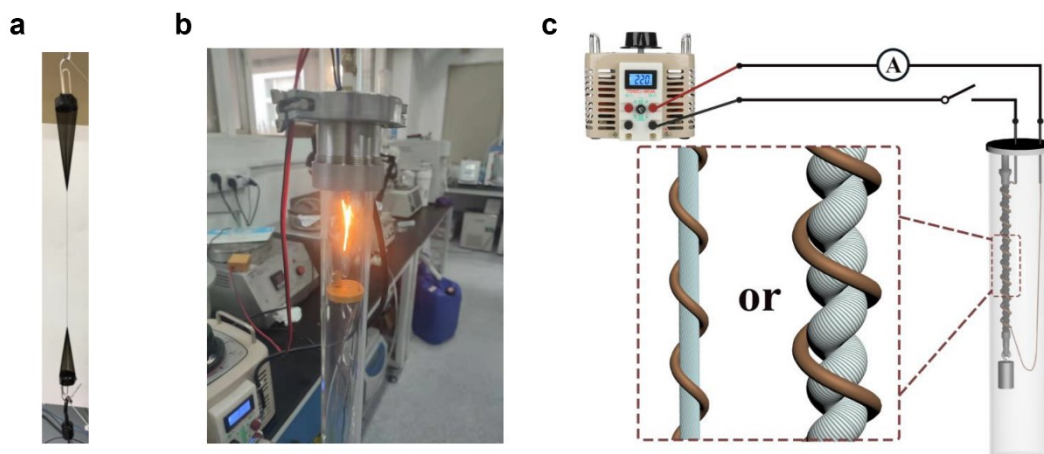

**Figure S1. Setup for incandescent tension annealing process on CNT yarn.** (a) Optical image of a cone-spun twisted CNT yarn. (b) ITAP for a coiled CNT yarn. (c) Schematic illustration for ITAP.

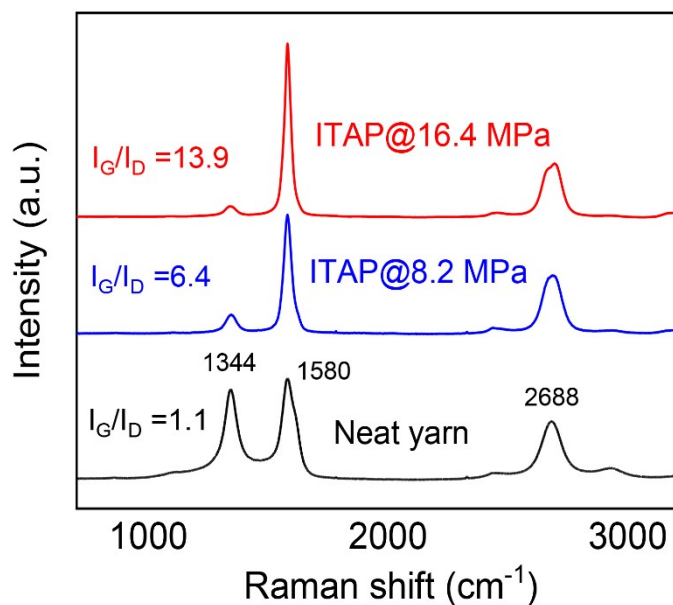

**Figure S2.** The ratio of the G-to-D peak intensities,  $I_G/I_D$ , in the Raman spectra for a neat CNT yarn and two ITAP CNT yarns. It can be seen that  $I_G/I_D$  increases from averages of 1.1 for the neat CNT yarn, to 6.4 and 13.9 for the ITAP@8.2 and ITAP@16.4 CNT yarns, respectively.

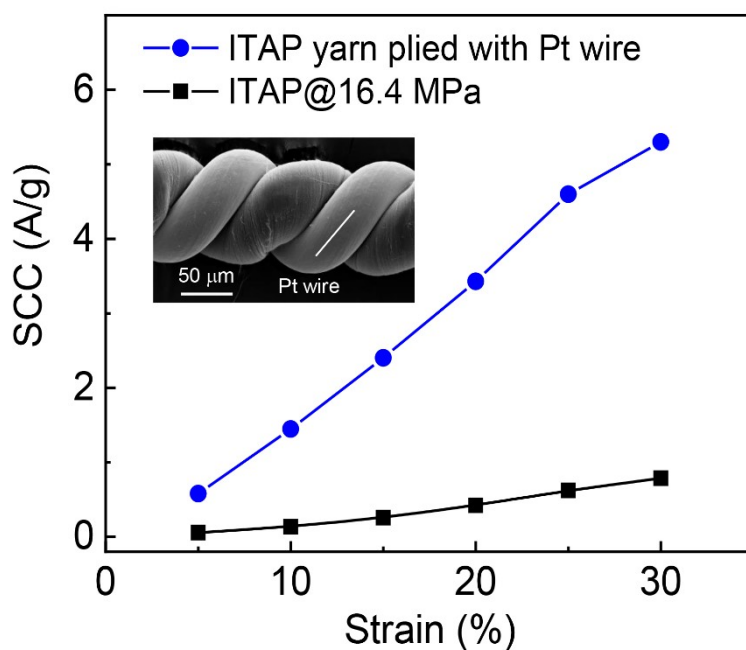

**Figure S3.** The strain dependence of generated SCC for an ITAP@16.4 MPa yarn and an ITAP@16.4 MPa CNT yarn plied with a 0.05-mm-diameter Pt wire.

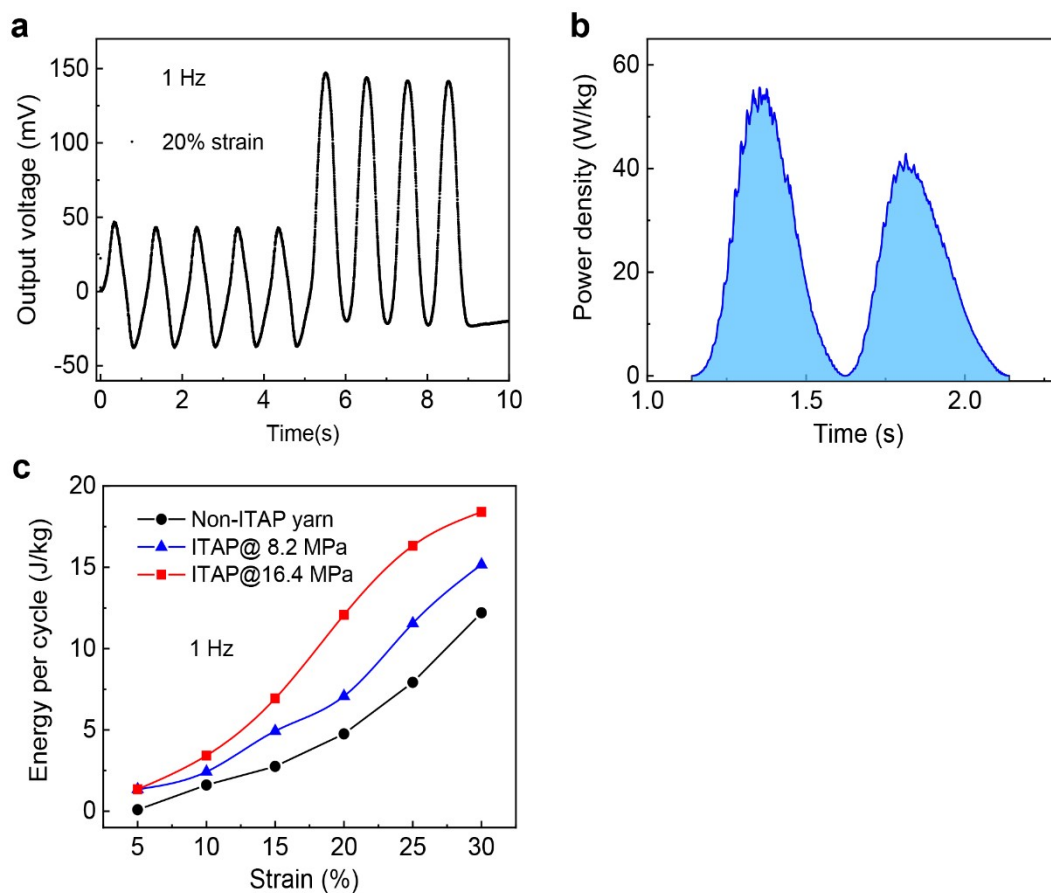

**Figure S4.** (a) The output voltage as a function of time for an ITAP@8.2 CNT yarn with and without the load resistance. (b) The calculated output power density as a function of time during a cycle. (c) The strain dependence of generated energy density per cycle for a non-ITAP yarn, an ITAP@8.2 MPa yarn, and an ITAP@16.4 MPa, respectively.

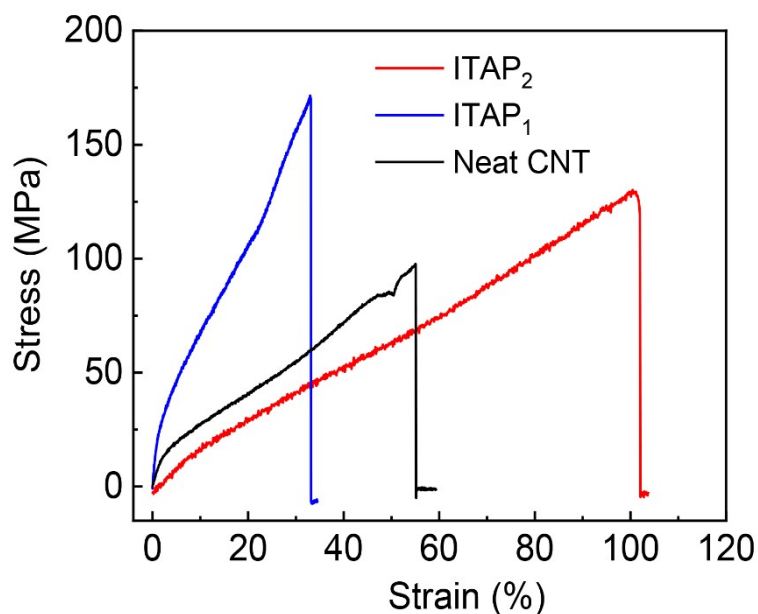

**Figure S5.** Stress-strain curves for a coiled neat CNT yarn, a coiled ITAP<sub>1</sub> yarn (doing the ITAP process after it was coiled), and ITAP<sub>2</sub> (doing the ITAP process before it was coiled) yarn, respectively.

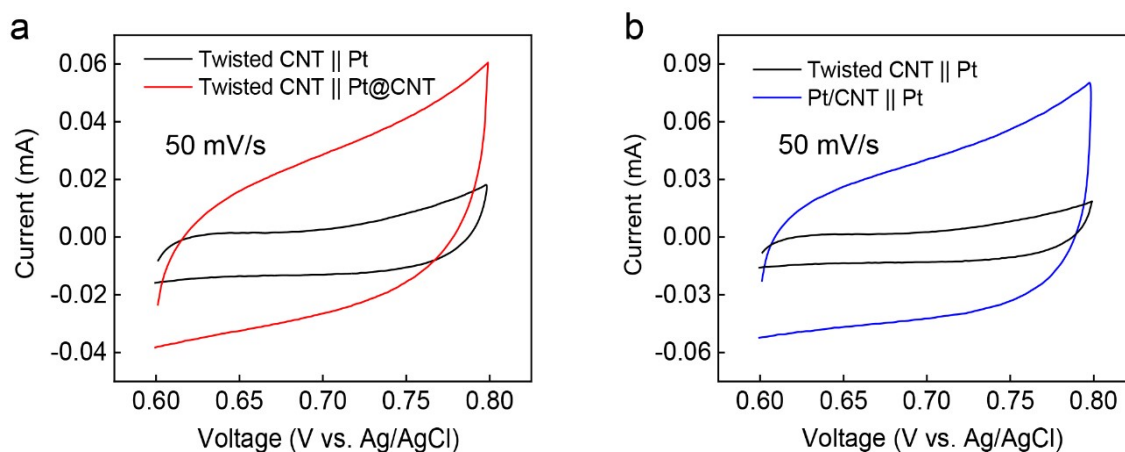

**Figure S6.** (a) The comparison of CV results for a fully-twisted CNT yarn that uses Pt mesh and Pt mesh containing multi-layers CNT sheets as counter electrode, respectively. (b) The comparison of CV results for a fully-twisted CNT yarn and Pt mesh containing multi-layers CNT sheets that uses a same Pt wire as the counter electrode.

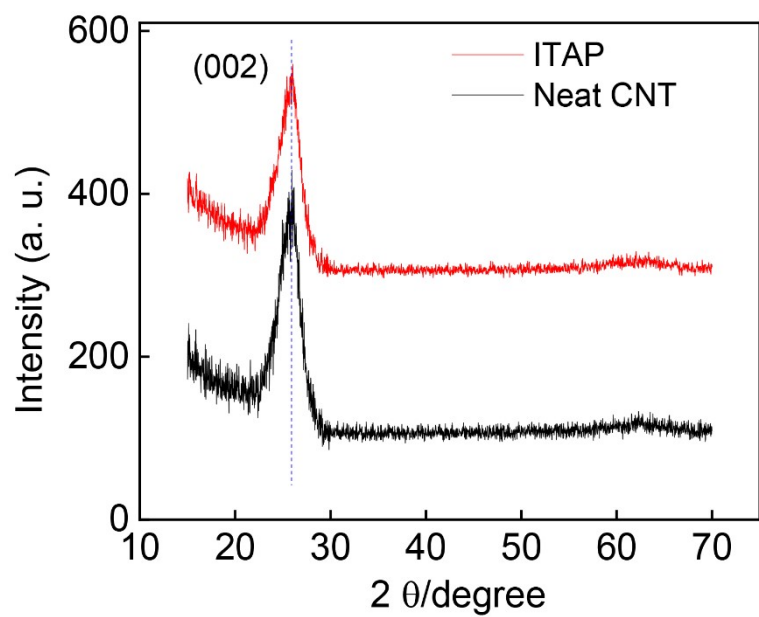

**Figure S7.** X-ray diffraction pattern of a CNT yarn and an ITAP yarn.
